# Supplementary material for: Soehngenia longivitae sp. nov., a Fermenting Bacterium Isolated from a Petroleum Reservoir in Azerbaijan, and Emended Description of the Genus Soehngenia
Source: PubMed Central journal article supplement (PMC7763609; doi:10.3390/microorganisms8121967), 2020-12-11
Supplement: microorganisms-08-01967-s001.pdf [file microorganisms-08-01967-s001.pdf]

## *Supplementary Material*

### ***Soehngenia longivita* sp. nov., a fermenting bacterium isolated from a petroleum reservoir in Azerbaijan, and emended description of the genus *Soehngenia***

**Tamara N. Nazina**<sup>1\*</sup>, **Salimat K. Bidzhieva**<sup>1</sup>, **Denis S. Grouzdev**<sup>2</sup>, **Diyana S. Sokolova**<sup>1</sup>, **Tatyana P. Tourova**<sup>1</sup>, **Sofiya N. Parshina**<sup>1</sup>, **Alexander N. Avtukh**<sup>3</sup>, **Andrey B. Poltarau**<sup>4</sup> and **Azhdar K. Talybly**<sup>5</sup>

<sup>1</sup> Winogradsky Institute of Microbiology, Research Center of Biotechnology, Russian Academy of Sciences, 117312 Moscow, Russia; [salima.bidjjeva@gmail.com](mailto:salima.bidjjeva@gmail.com) (S.K.B.); [sokolovadiyana@gmail.com](mailto:sokolovadiyana@gmail.com) (D.S.S.); [tptour@rambler.ru](mailto:tptour@rambler.ru) (T.P.T.); [sonjaparshina@mail.ru](mailto:sonjaparshina@mail.ru) (S.N.P.); [nazina@inmi.ru](mailto:nazina@inmi.ru) (T.N.N.)

<sup>2</sup> SciBear LLC, 13617 Tallinn, Estonia; [denisgrouzdev@gmail.com](mailto:denisgrouzdev@gmail.com) (D.S.G.)

<sup>3</sup> Skryabin Institute of Biochemistry and Physiology of Microorganisms, Pushchino Scientific Center for Biological Research of the Russian Academy of Sciences, Pushchino, Moscow region 142290, Russia; [avtukh@rambler.ru](mailto:avtukh@rambler.ru) (A.N.A.)

<sup>4</sup> Engelhardt Institute of Molecular Biology, Russian Academy of Sciences, 119991 Moscow, Russia; [abpolt@gmail.com](mailto:abpolt@gmail.com) (A.B.P.)

<sup>5</sup> Institute of Microbiology of the National Academy of Sciences of Azerbaijan, AZ1073 Baku, Azerbaijan [ajdartalibli@mail.ru](mailto:ajdartalibli@mail.ru) (AKT)

\* Correspondence: [nazina@inmi.ru](mailto:nazina@inmi.ru); Tel.: +7-499-135-0341 (T.N.N.)

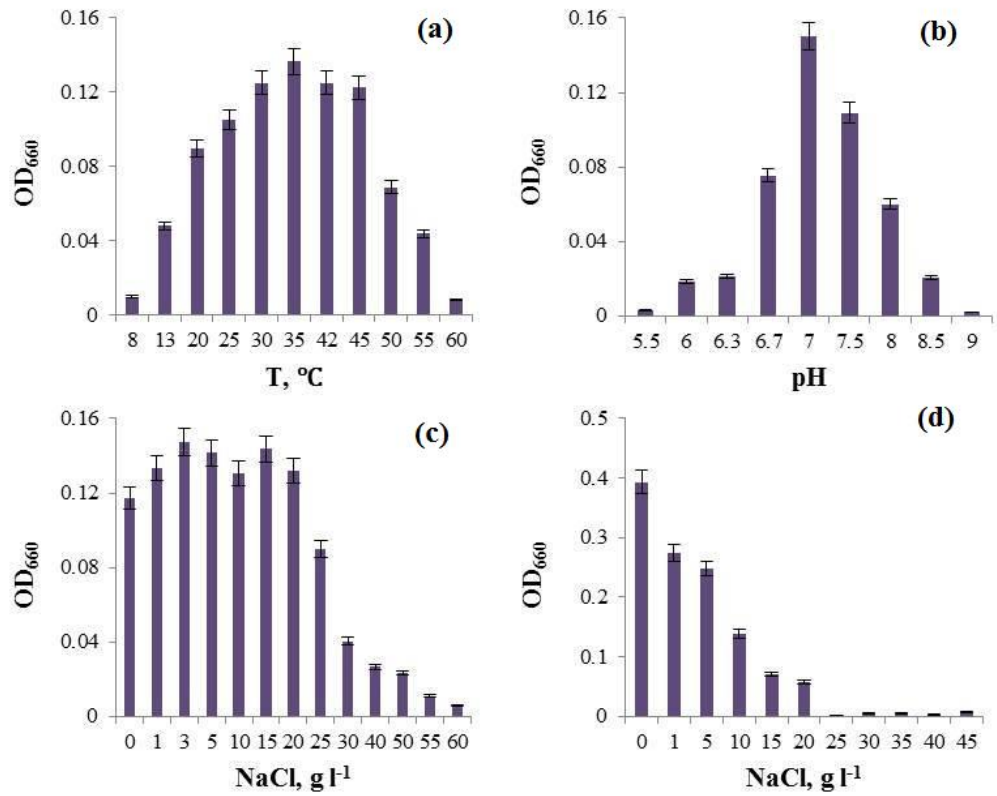

**Figure S1:** Growth profiles of strain 1933P<sup>T</sup> at various temperatures (a), pH (b) and NaCl concentration (w/v, %) (c), and of *S. saccharolytica* strain DSM 12858<sup>T</sup> (d) at various NaCl concentration (w/v, %).

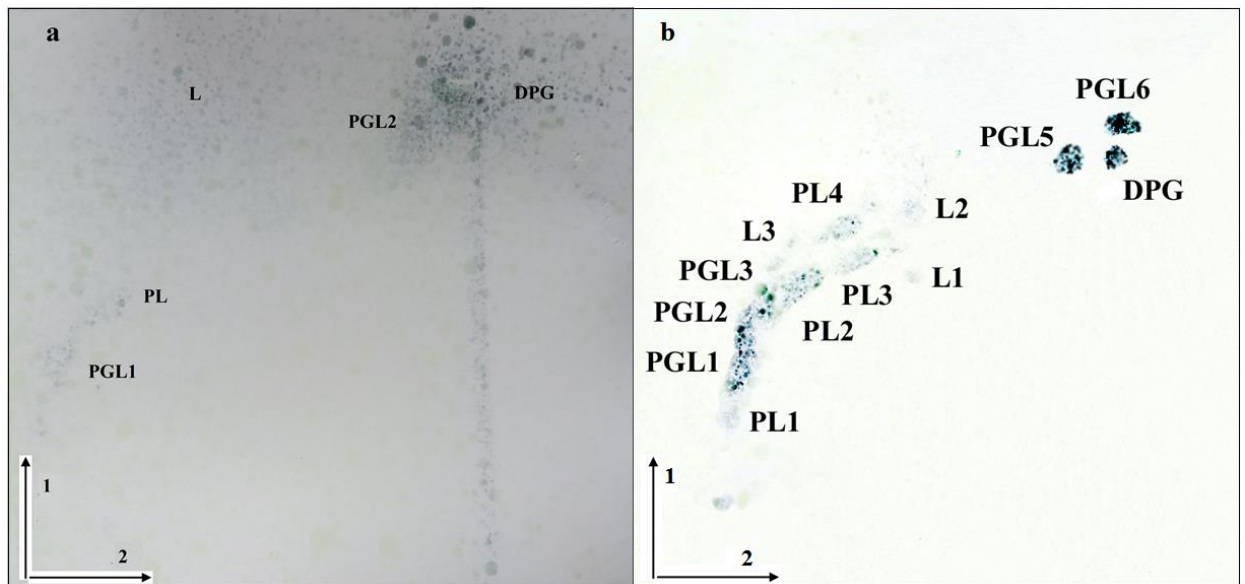

**Figure S2:** Thin layer chromatogram of polar lipids extracts from strain 1933P<sup>T</sup> (a) and *S. saccharolytica* DSM 12858<sup>T</sup> (b). Designations: GL – glycolipids; PGL – phosphoglycolipids, PL – phospholipids; L – lipids; DPG – diphosphoglycolipids.

### Subsystem Coverage

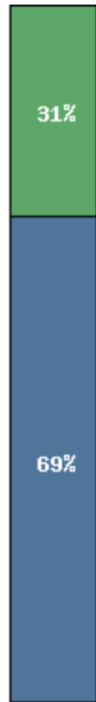

### Subsystem Category Distribution

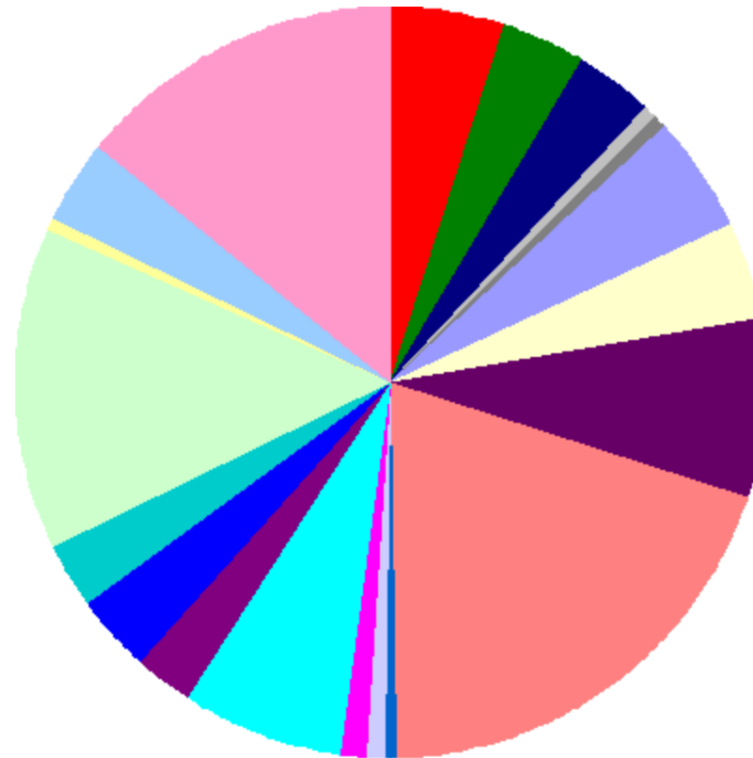

### Subsystem Feature Counts

- ⊕ Cofactors, Vitamins, Prosthetic Groups, Pigments (40)
- ⊕ Cell Wall and Capsule (26)
- ⊕ Virulence, Disease and Defense (27)
- ⊕ Potassium metabolism (2)
- ⊕ Photosynthesis (0)
- ⊕ Miscellaneous (4)
- ⊕ Phages, Prophages, Transposable elements, Plasmids (3)
- ⊕ Membrane Transport (39)
- ⊕ Iron acquisition and metabolism (0)
- ⊕ RNA Metabolism (32)
- ⊕ Nucleosides and Nucleotides (60)
- ⊕ Protein Metabolism (150)
- ⊕ Cell Division and Cell Cycle (3)
- ⊕ Motility and Chemotaxis (7)
- ⊕ Regulation and Cell signaling (8)
- ⊕ Secondary Metabolism (0)
- ⊕ DNA Metabolism (53)
- ⊕ Fatty Acids, Lipids, and Isoprenoids (20)
- ⊕ Nitrogen Metabolism (0)
- ⊕ Dormancy and Sporulation (2)
- ⊕ Respiration (26)
- ⊕ Stress Response (20)
- ⊕ Metabolism of Aromatic Compounds (1)
- ⊕ Amino Acids and Derivatives (106)
- ⊕ Sulfur Metabolism (5)
- ⊕ Phosphorus Metabolism (28)
- ⊕ Carbohydrates (101)

**Figure S3:** Subsystems of strain 1933P<sup>T</sup> based on SEED database.

**A**

*Sporanaerobacter acetigenes* DSM 13106  
*Anaerosalibacter massiliensis* ND1  
*Keratinibaculum paraultunense* DSM 26752  
*Clostridium ultunense* DSM 1052  
*Tepidimicrobium xylanilyticum* DSM 23310  
*Tissierella praeacuta* NCTC11158  
*Tissierella creatinophila* DSM 6911  
*Tissierella creatinini* BN11  
*Gudongella oleilytica* W6  
*Soehngenia saccharolytica* DSM 12858  
***Soehngenia longivitae* 1933P**

Complete, %

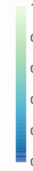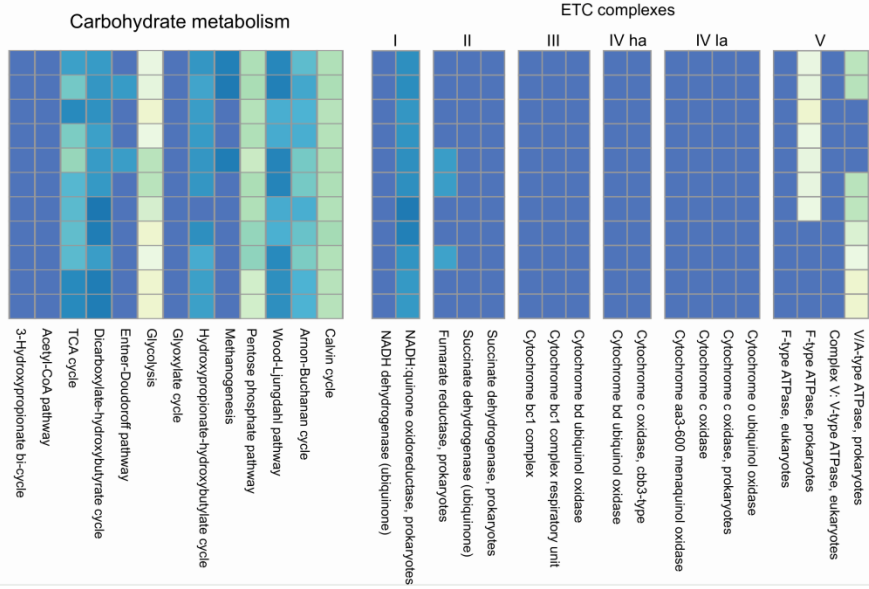

**B**

*Sporanaerobacter acetigenes* DSM 13106  
*Anaerosalibacter massiliensis* ND1  
*Keratinibaculum paraultunense* DSM 26752  
*Clostridium ultunense* DSM 1052  
*Tepidimicrobium xylanilyticum* DSM 23310  
*Tissierella praeacuta* NCTC11158  
*Tissierella creatinophila* DSM 6911  
*Tissierella creatinini* BN11  
*Gudongella oleilytica* W6  
*Soehngenia saccharolytica* DSM 12858  
***Soehngenia longivitae* 1933P**

False  
 True

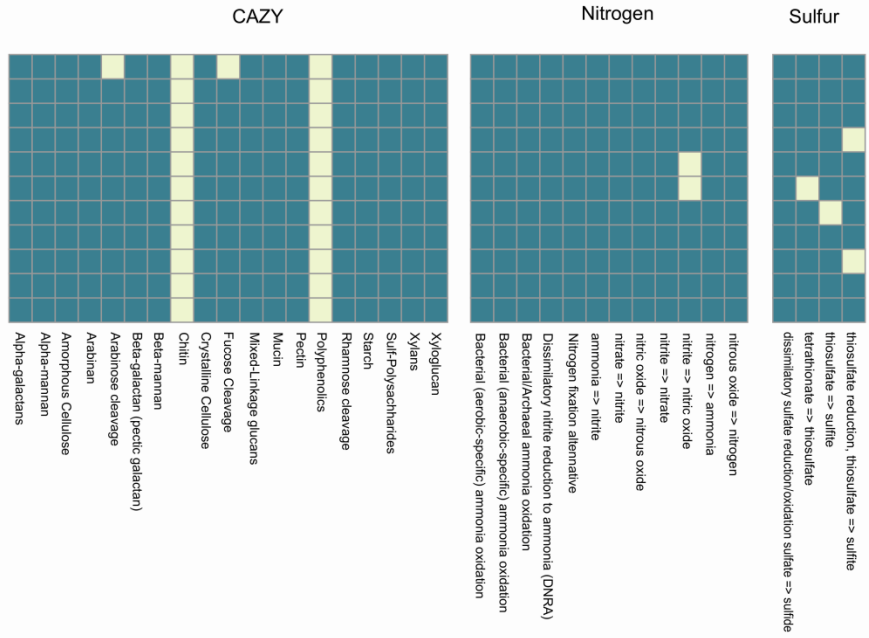

**Figure S4:** Heatmap profile showing the abundance of functional genes detected within the *Tissierellaceae* genomes. Heatmaps were automatically generated by DRAM. Sections of the heatmap are ordered to highlight information about pathway completion and ETC subunit completion (A). Boxes colored by presence/absence in (B) represent 1-2 genes necessary to carry out a particular process.

**Table S1:** Comparison of enzymatic activities of strains 1933P<sup>T</sup> and *S. saccharolytica* DSM 12858<sup>T</sup> determined by the api®ZYM test (bioMérieux, France). +, positive; –, negative; W, weakly positive.

| <b>Enzyme</b>                   | <b>1933P<sup>T</sup></b> | <b>DSM 12858<sup>T</sup></b> |
|---------------------------------|--------------------------|------------------------------|
| Alkaline phosphatase            | +                        | –                            |
| Esterase (C4)                   | –                        | –                            |
| Esterase Lipase (C8)            | W                        | –                            |
| Lipase (C14)                    | –                        | –                            |
| Leucine arylamidase             | –                        | –                            |
| Valine arylamidase              | –                        | –                            |
| Cystine arylamidase             | –                        | –                            |
| Trypsin                         | –                        | –                            |
| α-Chymotrypsin                  | –                        | –                            |
| Acid phosphatase                | W                        | +                            |
| Naphthol-AS-BI-phosphohydrolase | W                        | +                            |
| α-Galactosidase                 | –                        | –                            |
| β-Galactosidase                 | –                        | –                            |
| β-Glucuronidase                 | –                        | –                            |
| α-Glucosidase                   | –                        | –                            |
| β-Glucosidase                   | +                        | W                            |
| N-acetyl-β-glucosaminidase      | –                        | –                            |
| α-Mannosidase                   | –                        | –                            |
| α-Fucosidase                    | –                        | –                            |

**Table S2:** Fatty acid compositions\* of strain 1933P<sup>T</sup> and type strain of *Soehngenia saccharolytica* DSM 12858<sup>T</sup>.

| Fatty acid                        | 1933P <sup>T</sup> | DSM 12858 <sup>T</sup> |
|-----------------------------------|--------------------|------------------------|
| C <sub>11:0</sub>                 | 0.4                |                        |
| <i>iso</i> -C <sub>12:0</sub>     | 0.3                |                        |
| C <sub>12:0</sub>                 | 2.0                | 0.4                    |
| <i>iso</i> -C <sub>13:0</sub>     | 1.9                |                        |
| C <sub>13:0</sub>                 | <b>6.3</b>         |                        |
| <i>iso</i> -C <sub>14:0</sub>     | 1.0                |                        |
| C <sub>14:1</sub>                 |                    | 0.4                    |
| C <sub>14:0</sub>                 | <b>36.7</b>        | <b>9.5</b>             |
| <i>iso</i> -C <sub>15:0</sub>     | <b>8.3</b>         | 1.3                    |
| C <sub>15:0</sub>                 | 0.6                | 0.4                    |
| <i>iso</i> -C <sub>16:0</sub>     | 0.2                |                        |
| C <sub>16:1</sub>                 | <b>5.1</b>         | <b>20.5</b>            |
| C <sub>16:0</sub>                 | <b>29.7</b>        | <b>41.4</b>            |
| <i>iso</i> -C <sub>17:0</sub>     | 0.3                |                        |
| C <sub>17:1</sub>                 |                    | 0.4                    |
| <i>anteiso</i> -C <sub>17:0</sub> | 0.2                |                        |
| C <sub>17:0</sub>                 | 0.2                |                        |
| C <sub>18:1</sub>                 | 3.9                | <b>21.1</b>            |
| C <sub>18:0</sub>                 | 2.3                | 4.0                    |
| Other                             | 0.6                | 0.6                    |
| Total                             | 100.0              | 100.0                  |

\*The values are percentages (w/w) of total fatty acids. Both strains were cultivated in a liquid MM medium for 7 days at 30 °C. This medium contained peptone (2 g l<sup>-1</sup>), yeast extract (0.2 g l<sup>-1</sup>), and 1.5% NaCl for strain 1933P<sup>T</sup>, and sucrose (2 g l<sup>-1</sup>), yeast extract (1.0 g l<sup>-1</sup>) and 0.1% (w/v) NaCl for strain DSM 12858<sup>T</sup>. Dominant fatty acids are indicated in bold.

**Table S3:** General properties and relationship of the genomes of strain 1933P<sup>T</sup> and its closely related species *S. saccharolytica* DSM 12858<sup>T</sup>.

| Attribute                                       | <i>S. longivitae</i> 1933P <sup>T</sup><br>(GCF_004684055) |            | <i>S. saccharolytica</i> DSM<br>12858 <sup>T</sup> (2571042347) |            |
|-------------------------------------------------|------------------------------------------------------------|------------|-----------------------------------------------------------------|------------|
|                                                 | Value                                                      | % of Total | Value                                                           | % of Total |
| Genome size (bp)                                | 1,917,091                                                  | 100.00     | 2,002,213                                                       | 100.00     |
| DNA coding (bp)                                 | 1,757,471                                                  | 91.67      | 1,828,948                                                       | 91.35      |
| DNA G+C (bp)                                    | 610,836                                                    | 31.86      | 659,599                                                         | 32.94      |
| DNA scaffolds                                   | 33                                                         | 100.00     | 72                                                              | 100.00     |
| Total genes                                     | 1,853                                                      | 100.00     | 2,029                                                           | 100.00     |
| Protein coding genes                            | 1,789                                                      | 96.55      | 1,953                                                           | 96.25      |
| RNA genes                                       | 41                                                         | 2.21       | 76                                                              | 0.30       |
| Genes with function prediction                  | 1,633                                                      | 88.13      | 1,643                                                           | 80.98      |
| Protein coding genes with enzymes               | 601                                                        | 32.43      | 622                                                             | 30.66      |
| Protein coding genes connected to KEGG pathways | 657                                                        | 35.46      | 679                                                             | 33.46      |
| Genes assigned to COGs                          | 1,618                                                      | 87.32      | 1,441                                                           | 71.02      |
| Genes with Pfam domains                         | 1,622                                                      | 87.53      | 1,712                                                           | 84.38      |
| Genes with signal peptides                      | 51                                                         | 2.75       | 72                                                              | 3.55       |
| Genes with transmembrane helices                | 431                                                        | 23.26      | 448                                                             | 22.08      |



**Table S4:** AAI and POCP values of strain 1933P<sup>T</sup> and other related members of the families *Tissierellaceae* and *Gottschalkiaceae*

| Organism |    | POCP                                                                        |      |      |      |      |      |      |      |      |      |      |      |      |      |
|----------|----|-----------------------------------------------------------------------------|------|------|------|------|------|------|------|------|------|------|------|------|------|
|          |    | 1                                                                           | 2    | 3    | 4    | 5    | 6    | 7    | 8    | 9    | 10   | 11   | 12   | 13   |      |
| AAI      | 1  | <i>Soehngenia longivitae</i> 1933P <sup>T</sup> (GCF_004684055)             | 100  | 88.3 | 59.9 | 47.2 | 48.9 | 52.2 | 48.7 | 49.2 | 50.5 | 47.8 | 47.7 | 35.4 | 36.7 |
|          | 2  | <i>Soehngenia saccharolytica</i> DSM 12858 <sup>T</sup> (2571042347)        | 86.8 | 100  | 59.5 | 46.4 | 49.7 | 52.7 | 48.4 | 49.6 | 50.1 | 46.8 | 46.8 | 35.1 | 36.5 |
|          | 3  | <i>Gudongella oleilytica</i> W6 <sup>T</sup> (GCF_004101785)                | 63.3 | 63.1 | 100  | 40.3 | 46.8 | 45.6 | 43.0 | 44.6 | 52.0 | 45.5 | 46.7 | 33.5 | 34.5 |
|          | 4  | <i>Anaerosalibacter massiliensis</i> ND1 <sup>T</sup> (GCF_000751555)       | 58.4 | 57.9 | 58.3 | 100  | 58.1 | 57.5 | 61.6 | 58.3 | 42.6 | 43.9 | 52.3 | 43.4 | 46.9 |
|          | 5  | <i>Clostridium ultunense</i> DSM 1052 <sup>T</sup> (GCF_000511955)          | 59.0 | 59.2 | 59.9 | 65.1 | 100  | 63.6 | 57.9 | 67.4 | 48.2 | 45.9 | 56.2 | 41.8 | 43.5 |
|          | 6  | <i>Keratinibaculum paraultunense</i> DSM 26752 <sup>T</sup> (GCF_004343355) | 59.7 | 60.3 | 59.5 | 65.5 | 72.5 | 100  | 62.2 | 61.9 | 49.3 | 47.4 | 55.8 | 44.0 | 43.8 |
|          | 7  | <i>Sporanaerobacter acetigenes</i> DSM 13106 <sup>T</sup> (GCF_900130025)   | 58.4 | 58.5 | 58.6 | 69.6 | 65.2 | 65.8 | 100  | 58.4 | 45.1 | 45.6 | 55.5 | 43.1 | 45.2 |
|          | 8  | <i>Tepidimicrobium xylanilyticum</i> DSM 23310 <sup>T</sup> (GCF_900106765) | 59.2 | 59.7 | 59.7 | 63.1 | 76.2 | 69.7 | 63.8 | 100  | 46.4 | 45.3 | 55.0 | 42.4 | 45.0 |
|          | 9  | <i>Tissierella creatinini</i> BN11 <sup>T</sup> (GCF_005046945)             | 60.9 | 61.1 | 62.3 | 59.1 | 61.3 | 60.9 | 60.1 | 61.1 | 100  | 50.2 | 50.7 | 41.2 | 40.6 |
|          | 10 | <i>Tissierella creatinophila</i> DSM 6911 <sup>T</sup> (GCF_001940565)      | 59.0 | 59.0 | 59.9 | 58.7 | 60.9 | 60.1 | 58.8 | 59.8 | 62.3 | 100  | 50.8 | 39.5 | 42.0 |
|          | 11 | <i>Tissierella praeacuta</i> NCTC11158 <sup>T</sup> (GCF_900460335)         | 60.6 | 60.7 | 62.0 | 62.2 | 64.8 | 64.6 | 63.0 | 64.1 | 64.2 | 63.6 | 100  | 43.0 | 43.7 |
|          | 12 | <i>Gottschalkia acidurici</i> 9a <sup>T</sup> (GCF_000299355)               | 54.6 | 54.4 | 54.8 | 58.5 | 57.3 | 57.4 | 58.7 | 57.2 | 55.9 | 55.9 | 57.3 | 100  | 61.5 |
|          | 13 | <i>Gottschalkia purinilytica</i> DSM 1384 <sup>T</sup> (GCF_001190785)      | 56.0 | 55.5 | 55.2 | 60.0 | 58.3 | 58.4 | 59.9 | 58.2 | 56.6 | 55.9 | 57.4 | 67.3 | 100  |
